# Supplementary material
Source: publisher figshare collection journal article supplement (https://tandf.figshare.com/articles/dataset/_/7642487)
Supplement: Supplementary file 3 [file 1]

Archive with 3 entries (3 files):
- OSM_code.pdf
- Online_Supporting_Materials_20180614_B-F.doc
- Usami&Murayama_Online_Supporting_Materials_text_20180313.pdf
